# Supplementary material for: Differentially expressed transcripts and associated protein pathways in basilar artery smooth muscle cells of the high-salt intake–induced hypertensive rat
Source: PeerJ. 2020 Oct 13;8:e9849. doi: 10.7717/peerj.9849 (PMC7566752; doi:10.7717/peerj.9849)
Supplement: Supplemental Information 3 [file peerj-08-9849-s003.xlsx]

## Sheet: Sheet1
Clasp1		Pafah1b1		Akap9		Egf		Tp53
Ctrl	HS	Ctrl	HS	Ctrl	HS	Ctrl	HS	Ctrl	HS
1.989	0.757	1.139	0.413	1.232	0.414	0.854	0.455	1.0958	0.411
1.325	0.869	1.099	0.589	0.8945	0.682	1.158	0.4	0.993	0.453
1.379	0.846	0.899	0.712	1.136	0.595	0.933	0.3726	0.902	0.313
	0.698							1.26	0.2611
Igf1		Mmp9		Fyn		Gja1		Mdc1
Ctrl	HS	Ctrl	HS	Ctrl	HS	Ctrl	HS	Ctrl	HS
0.949	0.781	1.124	1.57	0.837	2.001	0.802	1.222	0.94	3.841
0.878	0.605	0.891	1.68	1.326	2.77	0.959	1.28	0.974	2.731
1.094	0.554	0.979	1.688	0.942	1.955	1.134	1.422	0.993	2.58
1.367	0.699	1.479	2.284	0.905	1.63	1.146		1.1
